1    How to build a mycelium: tradeoffs in fungal architectural traits

2

3

4    Anika Lehmann 1,2,\* , Weishuang Zheng 3 , Katharina Soutschek 1, Matthias C.

5    Rillig 1,2

6

7    1 Freie Universität Berlin, Institut für Biologie, Plant Ecology, Altensteinstr. 6, D-14195

8    Berlin, Germany;

9    2 Berlin-Brandenburg Institute of Advanced Biodiversity Research (BBIB), D-14195 Berlin,

10   Germany;

11   3 State key Laboratory of Microbial Technology, Shandong University, Qingdao 266237,

12   China

13

14   \* Corresponding author, Freie Universität Berlin, Institut für Biologie, Plant Ecology,

15   Altensteinstr. 6, D-14195 Berlin, Germany. Tel.: +49 30 83853145. Fax: 49 30 83853886.

16   E-mail address: lehmann.anika@googlemail.com

17

18   Keywords: saprobic fungi, traits, tradeoff, mycelium, architecture

19

## 20 Abstract

21

22 The fungal mycelium represents the essence of the fungal lifestyle, and understanding how a  
23 mycelium is constructed is of fundamental importance in fungal biology and ecology.

24 Previous studies have examined initial developmental patterns or focused on a few strains,  
25 often mutants of model species, and frequently grown under non-harmonized growth  
26 conditions; these factors currently collectively hamper systematic insights into rules of  
27 mycelium architecture. To address this, we here use a broader suite of fungi (31 species  
28 including members of the Ascomycota, Basidiomycota and Mucoromycotina), all isolated  
29 from the same soil, and test for ten architectural traits under standardized laboratory  
30 conditions.

31 We find great variability in traits among the saprobic fungal species, and detect several clear  
32 tradeoffs in mycelial architecture, for example between internodal length and hyphal  
33 diameter. Within the constraints so identified, we document otherwise great versatility in  
34 mycelium architecture in this set of fungi, and there was no evidence of trait 'syndromes' as  
35 might be expected.

36 Our results point to an important dimension of fungal properties with likely consequences for  
37 coexistence within local communities, as well as for functional complementarity (e.g.  
38 decomposition, soil aggregation).

39

40

## 41 Introduction

42

43 The mycelium comprises the entirety of the hyphae of a fungus, representing its nutrient-  
44 capture and interaction interface, and the infrastructure for transport within the fungal  
45 individual. This structure is designed for a dynamic exploratory lifestyle with its ability to  
46 reconfigure, fragment and fuse, and represents the very essence of the fungal lifestyle<sup>1</sup>.  
47 Understanding how a mycelium is built is therefore of fundamental importance for gaining  
48 insight into fungal biology and ecology.

49 The initial development of the mycelium starting from germinating spores has been  
50 extensively studied (e.g.<sup>2,3</sup>), revealing some general hyphal growth patterns: emerging from a  
51 spore, a hypha extends at an exponential rate followed by a constant linear phase until the  
52 formation of a new branch is initiated; each new branch itself follows this exponential–linear  
53 phase pattern. Additionally, hyphae show negative autotropism and radial orientation away  
54 from the colony center<sup>3</sup>, eventually giving rise to the characteristic circular (in 2D) or  
55 spherical (in 3D) shape of ‘colonies’ or fungal individuals.

56 Mycologists have also examined the kinetics and branching behavior of fungi with a focus on  
57 a limited suite of traits and with a typical focus on mutants of the same species or a few  
58 species, mainly derived from fungal culture collections (e.g.<sup>4-6</sup>). These investigations revealed  
59 that fungal mycelia undergo changes in growth behavior due to differentiation. Studies on  
60 *Neurospora crassa* revealed that after approximately 22 h branching angles decrease while  
61 hyphal extension rate and diameters increase. Ultimately, the mycelium establishes a  
62 hierarchy in which hyphae of higher branching order have decreased hyphal growth rate and  
63 diameter in relation to the parental hyphae from which they emerged. As a consequence, the  
64 space-filling capacity of the mycelium increases<sup>7</sup>, leading to a maximum surface area while  
65 investing in a minimum of hyphal length<sup>8</sup>.

66

67 Apart from such studies of development, there is no systematic comparison of a range of  
68 architectural features, measured under the same, standardized laboratory conditions, on a  
69 larger set of fungi from a common ecological context. This is why we currently only have  
70 limited knowledge about tradeoffs governing mycelium architecture that could give insight on  
71 architectural ‘rules’. So far, insights into such tradeoffs come from studying single species or  
72 mutants, and this frequently has not resulted in a consensus. For example, the relationship  
73 between hyphal diameter and growth rate can be positive (e.g. *Bortrytis*) or neutral (e.g.,  
74 *Mucor* strains)<sup>9</sup>. The same discrepancy holds true for the relationship between hyphal  
75 branching frequency (number of hyphal tips) and hyphal growth rate, which was examined in

76 multiple studies focusing on *Neurospora* strains and mutants: some studies found a positive  
77 relationship<sup>10</sup> and others did not<sup>11</sup>.  
78 Recently, advantages of pursuing a trait-based approach in fungal ecology have been  
79 introduced<sup>12,13</sup>. One clear benefit of such an approach is to move beyond idiosyncratic  
80 comparisons of a few isolates to making comparisons using larger sets of fungal isolates,  
81 offering opportunities for more general inferences about mycelium architectural rules.  
82 Here, we report on studies designed to collect mycelium architecture traits for a set of 31  
83 saprobic fungal strains, containing members of the phyla Ascomycota, Basidiomycota and  
84 Mucoromycotina. Our goal was to uncover general ‘rules’ of mycelium construction by  
85 identifying tradeoffs among mycelium growth characteristics within this set of fungi, all  
86 isolated from the same soil.  
87

## 88 Materials and Methods

89 **Fungal strains.** Fungal strains were originally cultured from Mallnow Lebus, a dry grassland  
90 in a nature conservation reserve (Brandenburg, Germany, 52° 27.778' N, 14° 29.349' E). A  
91 set of 31 fungal strains were isolated from soil samples as described in Andrade-Linares et  
92 al.<sup>14</sup>. Briefly, soils were diluted or washed to minimize spore abundance and increase the  
93 isolation of fungi derived from hyphae attached to soil particles<sup>15,16</sup>. For isolation a variety of  
94 media and antibiotics were used to target Ascomycota, Basidiomycota and Mucoromycotina  
95 while suppressing bacterial growth. Isolates were incubated at 22°C and were cultured on  
96 PDA. The fungal set comprised members of the Ascomycota (twenty strains), Basidiomycota  
97 (four strains) and Mucoromycotina (seven strains) (**Fig.1a, Table S1**).

98  
99 **Architecture traits.** We conducted two separate studies to collect architectural traits for the  
100 31 fungal strains. All studies were performed *in vitro* with PDA as growth substrate. In the  
101 first study, we focused on measuring hyphal branching angle (BA), internodal length (IL) and  
102 diameter (D). For this, the fungal strains were grown on single concavity slides carrying 150  
103 µl of PDA. We chose to reduce the concentration of PDA to 10% to obtain nutrient reduced  
104 growth medium for reduced mycelial density. This was necessary to be able to identify single  
105 hyphae in very densely growing fungi. To guarantee solidification of the medium, we added  
106 agar (Panreac AppliChem) to reach 15 g L<sup>-1</sup> concentration. The growth medium was flattened  
107 by placing a cover slip on the liquid medium drop until it solidified. A pre-sterilized poppy  
108 seed carrying the target fungal strain was positioned in the center of the concavity. The slide  
109 was placed in a 9 cm Petri dish filled with a 5 mm layer of water agar to maintain high air  
110 humidity. Plates were sealed and stored at room temperature (22 °C) in the dark until the

111 fungal colony covered half of the concavity area. For each fungal strain five slides were  
112 prepared and placed in separate Petri dishes. For the measurements, slides were examined  
113 under the microscope (Leica DM2500, bright field, 200x). Per slide, we randomly chose five  
114 hyphae as subsamples; for each of these hyphae we measured at the colony edge the last  
115 developed branching angle, the internodal lengths between this last and second-to-last  
116 branch and the hyphal diameters within this youngest internodal segment. For analyses, we  
117 used the image processing software ImageJ<sup>17</sup>. For each experimental unit, we calculated a  
118 mean value and a coefficient of variation (CV) from the subsample data. These represented  
119 two aspects of a trait: the average value and its variability. The trait data used in statistical  
120 analyses were the average of mean values and CVs of five replicates (i.e. n = 31).

121

122 In the second study, we investigated the complexity and the heterogeneity of fungal mycelia  
123 by applying fractal analysis – a technique used to assess self-similarity and space-filling  
124 capacity of fungal hyphae<sup>18</sup>. For this, we applied the same approach as in the first  
125 experiment but with eight replicates per fungal strain. At harvest, the slides were examined  
126 under the microscope (Leica DM2500, bright field, 200x) focusing on the outer 200  $\mu\text{m}$  of the  
127 growing zone to investigate the “surface fractals”<sup>19</sup>. Camera (Leica DFC290) settings were  
128 chosen to generate grayscale photos with high contrast (background: white, hyphae: black;  
129 **Fig.1b**). For each slide, we photographed three fields of view at the colony edge. These  
130 settings and further image processing in ImageJ<sup>17</sup> and Adobe Illustrator (CS6, v.16.0.0) were  
131 necessary to guarantee comparable and unbiased photos that can be processed by image  
132 analysis software. First, photos were converted to 8-bit binary images in ImageJ and  
133 subsequently hyphae were skeletonized. For this, a thinning algorithm repeatedly reduced  
134 pixels from the edge of the target object until a one-pixel wide shape was reached<sup>20</sup>. In  
135 Illustrator, the skeletonized hyphae were reconnected and image artifacts excluded, if  
136 necessary. Line thickness was adjusted to mean diameter trait values derived from  
137 experiment one. The final processed images were loaded into the ImageJ plug-in “FracLac”<sup>21</sup>  
138 to measure fractal dimensions. We chose box counting dimensions (Db) as a measure of  
139 structural complexity (i.e. the degree of detail or amount of parts a pattern consists of), and  
140 lacunarity (L) as a representative of structural heterogeneity (i.e. the gappiness or “rotational  
141 and translational invariance” in a pattern<sup>21</sup>). We used default settings but allowed for  
142 rotational orientations in analyses. Finally, subsample data were used to calculate CVs for  
143 box counting dimension and lacunarity. The subsample data were then merged to one mean  
144 and CV trait value per replicate. Additionally, we verified if implementing diameter data  
145 altered fractal dimension data by correlating skeletonized and adjusted diameter data for  
146 both box counting dimension and lacunarity (**Fig. S1**).

147

148 **Statistics.** We analyzed the relationships between the ten architectural trait variables  
149 derived from 31 saprobic fungal strains represented by both mean value and coefficients of  
150 variation (CV) ( $n = 31$ ). First, to evaluate fungal distribution in ten-dimensional trait space, we  
151 ran a principal component analysis using the function `prcomp()` in the package “stats” with z-  
152 transformed data. Significance of PC axes was determined via the function `testdim()`<sup>22</sup> in the  
153 package “ade4”<sup>23-25</sup>. Only the first axis was significant, hence we included PC axis 1 and 2 in  
154 the visualizations without losing information from the excluded axes. Next, we conducted  
155 kernel density estimation to assess species occurrence probability following the procedure  
156 presented by Diaz et al.<sup>26</sup>. Briefly, we used `kde()` function of the “ks” package<sup>27</sup> with  
157 unconstrained bandwidth selectors by implementing the function `Hpi()` on our first two PC  
158 axes. Using the function `contourLevels()` we estimated contour probabilities for 0.5 and 0.95  
159 quantiles.

160 Second, to test for phylogenetic signal in our trait variables we used Moran’s I statistic, a  
161 measure for phylogenetic autocorrelation, as implemented in the package “phylosignal”. We  
162 accounted for phylogenetic relatedness among species (indicated by detected phylogenetic  
163 signals) by calculating phylogenetically independent contrast of our trait variables with the  
164 packages “picante”<sup>28</sup> and “ape”<sup>29</sup> using the functions `pic()` and `match.phylo.data()`. We  
165 evaluated if the assumptions of the Brownian motion model were satisfied by our data<sup>30</sup>. For  
166 that, we investigated the standardization of the contrasts via diagnostic regression tests to  
167 evaluate the relationship between absolute standardized contrasts and (i) the square root of  
168 their standard deviation<sup>31</sup> and (ii) the node height (i.e. node age<sup>32,33</sup>). Identified influential  
169 nodes were excluded, following the threshold of absolute studentized residuals greater than  
170 3<sup>31,34</sup>. To satisfy the Brownian motion model assumption, we used log transformed trait  
171 values and excluded two outlier nodes (node 49 and 61<sup>35</sup>).

172 Third, multiple pairwise correlations using Pearson’s rho were conducted and plotted with the  
173 function `corrplot()` in the eponymous package<sup>36</sup>. Analyses were done for original (non-  
174 transformed,  $n = 31$ ) and phylogenetically corrected data (log-transformed,  $n = 28$ ).

175 Fourth, we ran linear regressions and further investigated the relationships by quantile  
176 regression with the package “quantreg” (<https://github.com/cran/quantreg>). Under most  
177 ecological conditions, linear regressions tend to over- or underestimate relationships due to a  
178 focus on the mean of the response distribution. Especially in wedge-shaped data  
179 distributions, indicating unmeasured limiting factors, quantile regressions are more  
180 informative since they test the relationship between response and predictor variable at their  
181 maxima<sup>37,38</sup>. Both regression analyses were run on z-transformed data and model residuals  
182 were tested for homogeneity and normal distribution. Additionally, we ran multiple pairwise  
183 regressions for both original and phylogenetically corrected data to provide graphical

184 information on data distributions of all trait combinations (see Fig. S2 and S3). These were  
185 generated by the function `ggpairs()` of the package `GGally`<sup>39</sup>.

186 All analyses were conducted in R (v. 3.4.1<sup>40</sup>) and plots were created with the graphics  
187 package `ggplot2`<sup>41</sup> and its extension `GGally`.

188

## 189 Results and discussion

190 **Trait expression.** Overall, we found high variability among strains for all traits (**Fig.1**). The  
191 application of fractal dimensions on mycelium structure revealed that trait mean values of  
192 box counting dimensions ( $D_b$ ) ranged between 1.2 and 1.6, where a value of 1 represents a  
193 single unbranched hypha, and a value of 2 a complex space-filling mycelium. The most  
194 complex mycelium was found in the Mucoromycotina, while Basidiomycota had the most  
195 simply structured mycelia. For lacunarity ( $L$ ), we found in our study that trait values ranged  
196 between 0.4 (Basidiomycota) and 0.7 (Ascomycota). With increasing trait value, the  
197 heterogeneity and hence gappiness of the mycelium increased. The investigation of hyphal  
198 features revealed that the branching angle ( $BA$ ) varied substantially across fungal strains  
199 from 26 to 86° with Mucoromycotina having large angles and Basidiomycota rather small  
200 angles. For hyphal diameter ( $D$ ) trait values ranged from 2.7 to 6.5  $\mu\text{m}$  across the 31 strains  
201 where both extremes could be found in the Mucoromycotina. The length of the hyphal  
202 internodes ( $IL$ ) showed considerable differences: Within Basidiomycota internodal lengths of  
203 453  $\mu\text{m}$  could be reached while in Mucoromycotina the lowest value of 40  $\mu\text{m}$  was measured.  
204 Our values are within the range of previously reported architectural features of selected,  
205 individual saprobic filamentous fungi (e.g.<sup>19,42-46</sup>).

206 After establishing the trait database, we investigated the trait space generated by the  
207 collected fungal architectural features. To do this, we applied principal component analyses.

208

209 **PCA.** For our 31 fungal strains, the sole significant first principal components accounted for  
210 34% of the variability in the ten architecture traits (**Fig. 2a**). In this ten-dimensional trait  
211 space, the set of our 31 fungal strains occupied the whole PC plane with a clear separation  
212 of the three phyla across the plane. Considering the sole significant PC axis 1, Ascomycota  
213 assembled in the center flanked by Mucoromycotina on the left, driven by large branching  
214 angles and high mycelial complexity, and Basidiomycota on the right portion, primarily  
215 characterized by long internodes and wide hyphal diameters (**Fig. S4**). Across species, some  
216 clear correlations among traits became visible; hence, we further investigated the type and  
217 intensity of potential architectural tradeoffs for our fungal set.

218



219 **Phylogenetic signal.** For this, we first tested all ten traits for a phylogenetic signal to  
220 evaluate if the phylogenetic relatedness among fungal strains can influence any trait  
221 relationships we want to investigate. Applying Moran's I statistics (**Table S2**), we found  
222 phylogenetic signals in Db ( $I = 0.16$ ,  $p = 0.02$ ) and  $L_{cv}$  ( $I = 0.13$ ,  $p = 0.02$ ). Hence, we needed to  
223 account for phylogenetic relations for these two traits among our 31 fungal strains by  
224 applying phylogenetically independent contrast in the following analyses.

225

226 **Tradeoffs.** We found 14 trait pairs with significant correlations of which ten passed  
227 phylogenetic correction (**Fig. 2b**, **Fig.S2** and **S3**). The strongest correlations were detected  
228 between mycelium complexity and its coefficient of variation (Db -  $Db_{cv}$  in **Fig.2c**), mycelium  
229 heterogeneity, as measured by lacunarity, (Db - L in **Fig.2d**) and hyphal diameter (Db - D in  
230 **Fig.2e**), as well as between branching angle and its coefficient of variation ( $BA - BA_{cv}$  in  
231 **Fig.2f**). For internodal length, we detected relationships with mycelium complexity (IL - Db in  
232 **Fig.2g**), variability in mycelium complexity (IL -  $Db_{cv}$  in **Fig.2g**) and hyphal diameter (IL - D in  
233 **Fig. 2i**). Another strong correlation was found between the coefficients of variation of  
234 mycelium complexity and branching angle ( $Db_{cv} - BA_{cv}$  in **Fig.2j**). In addition, weak  
235 correlations were found for D and  $Db_{cv}$ , D and  $L_{cv}$ , as well as between IL and  $L_{cv}$ , IL and BA  
236 (**Fig.S2** and **S3**). From these correlations we can deduce multiple rules for mycelium  
237 architecture.

238 For structural complexity (as represented by box counting dimensions) and branching angle  
239 we detected a negative relationship between their mean values and CVs (Db -  $Db_{cv}$  in **Fig.**  
240 **2c** and  $BA - BA_{cv}$  in **Fig. 2f**). Thus strains exhibiting a high trait value for BA or Db are  
241 restricted to this high value, while strains with low values in these traits are capable of further  
242 adjusting these features.

243 Within strains, variability in mycelial complexity itself is determined by increasing internodal  
244 length (IL -  $Db_{cv}$  in **Fig. 2h**) and higher flexibility in branching angle measures ( $Db_{cv} - BA_{cv}$  in  
245 **Fig. 2j**). Thus, the degree of mycelial complexity can be modulated via branching patterns  
246 (e.g. distance between branches).

247 Considering the complexity – the space-filling capacity – of a mycelium, we found that more  
248 complex mycelia are more heterogeneously structured (Db - L in **Fig.2d**). Mycelia with high  
249 space-filling capacity tend to be rather heterogeneous in their structure, i.e. their mycelium is  
250 not uniformly complex but rather exhibits complex zones replaced by more simple mycelium  
251 structures towards the growing edge. At the colony edge, hyphae are confronted with new  
252 resources and environmental conditions for which a maximum of flexibility is likely  
253 advantageous. Furthermore, complex mycelia have smaller hyphal diameters (Db - D in **Fig.**  
254 **2e**) and shorter internodal length (IL - Db in **Fig.2g**). A mycelium with long internodes is  
255 characterized by less branching and hence less space-filling. However, to be capable of



256 growing long internodes the mycelium needs to improve its structural support, i.e. its tear-  
257 resistance. Long hyphae are at risk of fragmentation by shear-stresses<sup>47</sup>. To deal with this  
258 risk, hyphal cell walls can thicken and/or hyphal diameter can increase<sup>5,48</sup>. This is congruent  
259 with our finding that long internodes are linked with larger hyphal diameters (IL - D in **Fig.2i**).

260

261 **Conclusion.** One of the most fundamental decisions a growing hypha has to make is when  
262 to branch. Thus, it is maybe not surprising that internodal length was a highly influential  
263 variable (aligned with PC axis 1, **Fig. 2**) in understanding the architecture of mycelia in trait  
264 space. This suggests that the trait internodal length is a main driver of mycelium architecture.  
265 Mycelia with short internodes can branch more frequently thus developing a more complex  
266 mycelium than those with long internodes. However, the capability of growing long  
267 unbranched hyphae enables the mycelium to more flexibly adjust their mycelial modules (see  
268 positive correlations between IL and  $Db_{CV}$ ,  $L_{CV}$ ) in response to environmental conditions.

269

270 It is interesting that there were no sharp boundaries in the sense of architectural 'syndromes'  
271 or clear groups of traits, but rather relatively gradual changes in trait values within the set of  
272 fungal isolates we examined. This illustrates the relative versatility of the mycelial growth  
273 form in evolutionary terms, at least in the peripheral growth zone of the fungus, which we  
274 examined here. We clearly show that there are limits to how a mycelium can be constructed,  
275 since some trait combinations are evidently not favorable (e.g. long internodes and small  
276 diameters). However, fungi have evidently otherwise filled the trait space within the  
277 constraints of such fundamental tradeoffs, even seen in a sample of 31 species. It will be  
278 interesting to compare our results to others sets of fungi once such data are available: our  
279 results suggest key parameters on which to focus.

280

281 Mycelial architecture is a fundamental property of filamentous fungi, governing the way these  
282 organisms explore their substrate. Using a set of fungi co-occurring in the same soil, we  
283 show that architectural features vary strongly and reproducibly among different isolates  
284 under the same laboratory conditions. It is therefore highly likely that such differences  
285 contribute to enabling coexistence within fungal communities<sup>49</sup> by offering fungi different  
286 ways to forage and colonize the soil environment. On the other hand, such trait divergence  
287 can also mediate functional complementarity, for example in decomposition or soil  
288 aggregation<sup>13</sup>.

289

290

291

## 292 References

- 293 1. Wessels, J. G. H. Fungi in their own right. *Fungal Genetics and Biology* **27**, 134-145  
294 (1999).
- 295 2. Plomley, N. J. B. Formation of the colony in the fungus *Chaetomium*. *Australian*  
296 *Journal of Biological Science* **12**, 53-64 (1959).
- 297 3. Trinci, A. P. J. A study of the kinetics of hyphal extension and branch initiation of  
298 fungal mycelia *Journal of Genetic Microbiology* **81**, 225-236 (1974).
- 299 4. Butler, G. M. Growth of hyphal branching systems in *Coprinus disseminatus*. *Annals*  
300 *of Botany* **25**, 341-& (1961).
- 301 5. McLean, K. M. & Prosser, J. I. Development of vegetative mycelium during colony  
302 growth of *Neurospora crassa*. *Transactions of the British Mycological Society* **88**, 489-  
303 495 (1987).
- 304 6. Robinson, P. M. & Smith, J. M. Apical branch formation and cyclic development in  
305 *Geotrichum candidum*. *Transactions of the British Mycological Society* **75**, 233-238  
306 (1980).
- 307 7. Barry, D. J. Quantifying the branching frequency of virtual filamentous microbes using  
308 fractal analysis. *Biotechnology and Bioengineering* **110**, 437-447 (2013).
- 309 8. Moore, D., Robson, G. D. & Trinci, A. P. J. 97-98 (Cambridge University Press,  
310 Cambridge, UK, 2011).
- 311 9. Carlile, M. J., Watkinson, S. C. & Gooday, G. W. (Academic Press, UK, 2001).
- 312 10. Katz, D., Goldstein, D. & Rosenberger, R. F. Model for branch initiation in *Aspergillus*  
313 *nidulans* based on measurements of growth parameters. *Journal of Bacteriology* **109**,  
314 1097-1100 (1972).
- 315 11. Watters, M. K., Lindamood, E., Meunich, M. & Vctor, R. Strain-dependent  
316 eelationship between growth rate and hyphal branching in *Neurospora crassa*.  
317 *Proceedings of the Indiana Academy of Science* **117**, 1-6 (2008).
- 318 12. Aguilar-Trigueros, C. A. *et al.* Branching out: Towards a trait-based understanding of  
319 fungal ecology. *Fungal Biology Reviews* **29**, 34-41 (2015).
- 320 13. Lehmann, A. & Rillig, M. C. Understanding mechanisms of soil biota involvement in  
321 soil aggregation: A way forward with saprobic fungi? *Soil Biology & Biochemistry* **88**,  
322 298-302 (2015).
- 323 14. Andrade-Linares, D. R., Veresoglou, S. D. & Rillig, M. C. Temperature priming and  
324 memory in soil filamentous fungi. *Fungal Ecology* **21**, 10-15 (2016).
- 325 15. Gams, W. & Domsch, K. H. Beitrage zur Anwendung der Bodenwaschtechnik für die  
326 Isolierung von Bodenpilzen. *Arch. Mikrobiol.* **58**, 134-144 (1967).
- 327 16. Thorn, R. G., Reddy, C. A., Harris, D. & Paul, E. A. Isolation of saprophytic  
328 basidiomycetes from soil. *Applied and Environmental Microbiology* **62**, 4288-4292  
329 (1996).
- 330 17. Schneider, C. A., Rasband, W. S. & Eliceiri, K. W. NIH Image to ImageJ: 25 years of  
331 image analysis. *Nature Methods* **9**, 671-675 (2012).
- 332 18. Posser, J. I. in *The growing fungus* (eds N.A.R. Gow & G.M. Gadd) (Springer, UK,  
333 1995).
- 334 19. Obert, M., Pfeifer, P. & Sernetz, M. Microbial growth patterns described by fractal  
335 geometry. *Journal of Bacteriology* **172**, 1180-1185 (1990).
- 336 20. Zhang, T. Y. & Suen, C. Y. A fast parallel algorithm for thinning digital patterns.  
337 *Communications of the Acm* **27**, 236-239 (1984).
- 338 21. Karperien, A. FracLac for ImageJ (1999-2013).
- 339 22. Dray, S. On the number of principal components: A test of dimensionality based on  
340 measurements of similarity between matrices. *Computational Statistics & Data*  
341 *Analysis* **52**, 2228-2237 (2008).
- 342 23. Chessel, D., Dufour, A. B. & Thioulouse, J. The ade4 package - I : One-table  
343 methods. *R News* **4**, 5-10 (2004).
- 344 24. Dray, S. & Dufour, A. B. The ade4 package: Implementing the duality diagram for  
345 ecologists. *Journal of Statistical Software* **22**, 1-20 (2007).

- 346 25. Dray, S., Dufour, A. B. & Chessel, D. The ade4 package-II: Two-table and K-table  
347 methods. *R News* **7**, 47-52 (2007).
- 348 26. Diaz, S. *et al.* The global spectrum of plant form and function. *Nature* **529**, 167-U173  
349 (2016).
- 350 27. Duong, T. ks: Kernel smoothing v. R package version 1.11.0. (2018).
- 351 28. Kembel, S. W. *et al.* Picante: R tools for integrating phylogenies and ecology.  
352 *Bioinformatics* **26**, 1463-1464 (2010).
- 353 29. Paradis, E., Claude, J. & Strimmer, K. APE: Analyses of Phylogenetics and Evolution  
354 in R language. *Bioinformatics* **20**, 289-290 (2004).
- 355 30. Cooper, N., Thomas, G. H. & FitzJohn, R. G. Shedding light on the "dark side" of  
356 phylogenetic comparative methods. *Methods in Ecology and Evolution* **7**, 693-699  
357 (2016).
- 358 31. Garland, T., Harvey, P. H. & Ives, A. R. Procedures for the analysis of comparative  
359 data using phylogenetically independent contrasts. *Systematic Biology* **41**, 18-32  
360 (1992).
- 361 32. Freckleton, R. P. & Harvey, P. H. Detecting non-Brownian trait evolution in adaptive  
362 radiations. *Plos Biology* **4**, 2104-2111 (2006).
- 363 33. Grafen, A. The phylogenetic regression. *Philosophical Transactions of the Royal  
364 Society of London Series B-Biological Sciences* **326**, 119-157 (1989).
- 365 34. Jones, K. E. & Purvis, A. An optimum body size for mammals? Comparative evidence  
366 from bats. *Functional Ecology* **11**, 751-756 (1997).
- 367 35. Orme, D. The caper package: comparative analysis of phylogenetics and evolution in  
368 R v. 1.0.1 (2013).
- 369 36. Wei, T. & Simko, V. R package "corrplot": Visualization of a Correlation Matrix v. 0.84  
370 (2017).
- 371 37. Cade, B. S. & Noon, B. R. A gentle introduction to quantile regression for ecologists.  
372 *Frontiers in Ecology and the Environment* **1**, 412-420 (2003).
- 373 38. Cade, B. S., Terrell, J. W. & Schroeder, R. L. Estimating effects of limiting factors with  
374 regression quantiles. *Ecology* **80**, 311-323 (1999).
- 375 39. Schloerke, B. *et al.* GGally: Extension to 'ggplot2' v. 1.3.2 (2017).
- 376 40. R Development Core Team. R: A language and environment for statistical computing  
377 v. 3.4.1 (2014).
- 378 41. Wickham, H. *ggplot2: Elegant graphics for data analysis*. (Springer, 2009).
- 379 42. Henis, Y., Okon, Y. & Chet, I. Relationship between early hyphal branching and  
380 formation of sclerotia in *Sclerotium rolfsii*. *Journal of General Microbiology* **79**, 147-  
381 150 (1973).
- 382 43. Ho, H. H. Hyphal branching systems in Phytophthora and other Phcomycetes.  
383 *Mycopathologia* **64**, 83-86 (1978).
- 384 44. Hutchinson, S. A., Sharma, P., Clarke, K. R. & Macdonald, I. Control of hyphal  
385 orientation in colonies of *Mucor hiemalis*. *Transactions of the British Mycological  
386 Society* **75**, 177-191 (1980).
- 387 45. Kotov, V., Anishchenko, I., Sirenko, I. & Reshetnikov, S. Statistical analysis of  
388 structural and kinetic characteristics of fungal colony growth with *Trichoderma viride*  
389 Pers.: S.F. Gray. *Microbiological Research* **160**, 273-278 (2005).
- 390 46. Trinci, A. P. J. A kinetic study of the growth of *Aspergillus nidulans* and other fungi.  
391 *Journal of Genetic Microbiology* **57**, 11-24 (1969).
- 392 47. Suijdam, J. C. & van Metz, B. Fungal pellet breakup as a function of shear in a  
393 fermentor. *Journal of fermentation technology* **59**, 329-333 (1981).
- 394 48. Trinci, A. P. J. & Collinge, A. J. Hyphal wall growth in *Neurospora crassa* and  
395 *Geotrichum candidum*. *Journal of General Microbiology* **91**, 355-361 (1975).
- 396 49. Crowther, T. W. *et al.* Untangling the fungal niche: the trait-based approach. *Frontiers  
397 in Microbiology* **5** (2014).
- 398
- 399

400 **Acknowledgements**

401 This work was supported by the Deutsche Forschungsgemeinschaft (RI 1815/16-1). MCR  
402 additionally acknowledges an ERC Advanced Grant (694368).

403

404 **Conflicts of interest**

405 The authors declare no conflicts of interest.

406

407 **Figure captions**

408

409 **Fig. 1 Overview of fungal strains, mycelial image and trait distribution.** (a) Phylogenetic tree of  
 410 the 31 fungal strains belonging to the phyla Ascomycota, Basidiomycota and Mucoromycotina with  
 411 colony pictures. Pictures are from four-week old cultures grown on potato dextrose agar, and their  
 412 order follows the order of the phylogenetic tree. Further information about phylogeny and accession  
 413 numbers of the 31 strains are available in **Table S1.** (b) An example of mycelial pictures obtained from  
 414 the setup introduced in the material and method section. Imaged strain is *Mucor fragilis*. (c) Tukey  
 415 boxplot of the ten architectural trait variables, mean value and their coefficient of variation (CV)  
 416 measured in this study: box counting dimension (unitless, Db with n= 8, Db<sub>CV</sub> with n= 8), lacunarity  
 417 (unitless, L with n= 8, L<sub>CV</sub> with n=8), branching angle (in °, BA with n= 5, BA<sub>CV</sub> with n= 5), hyphal  
 418 diameter (in μm, D with n= 5, D<sub>CV</sub> with n= 5), internodal length (in μm, IL with n= 5, IL<sub>CV</sub> with n= 5). The  
 419 boxplots represent 25th and 75th percentile, median and outlying points. Information about phylum  
 420 affiliation is color-coded (black: Mucoromycotina, grey: Basidiomycota, white: Ascomycota).  
 421

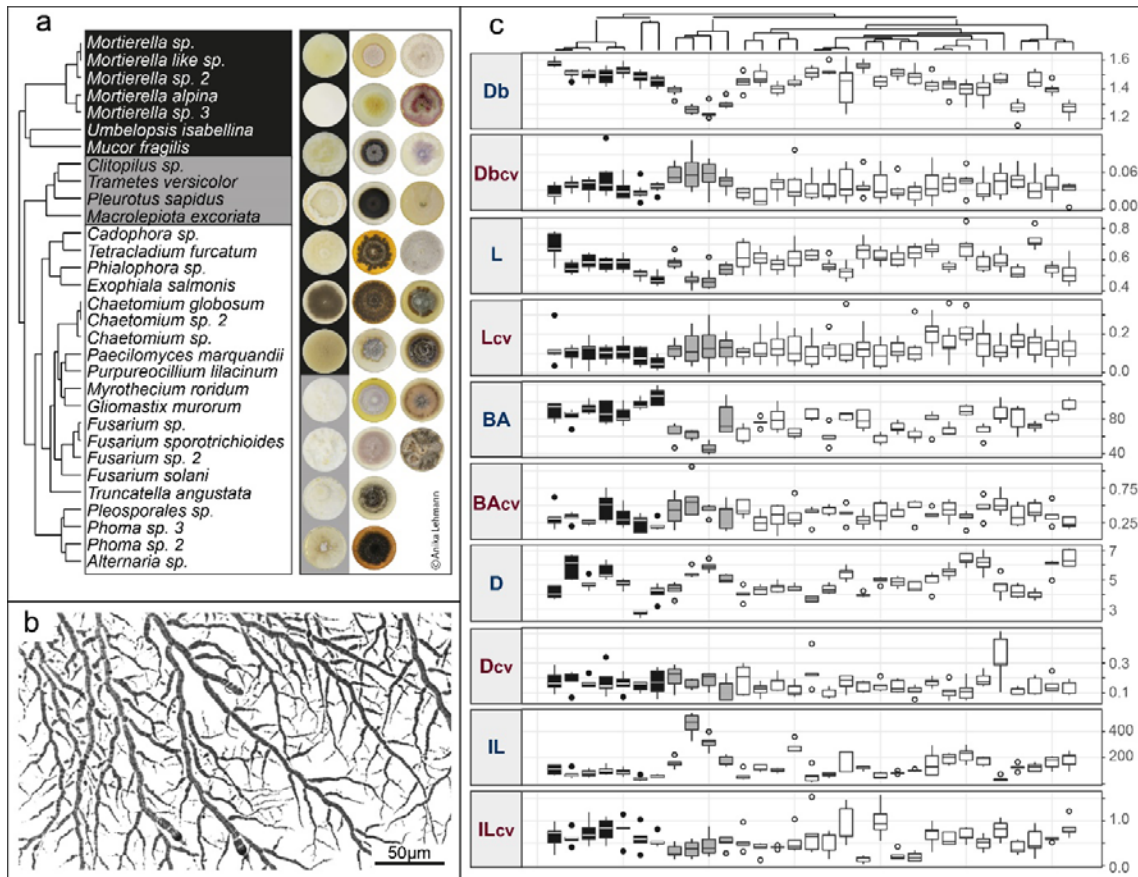

422

423

424

425

426 **Fig. 2 Outcomes of principal component analysis, trait correlation, linear and quantile**  
427 **regression of the investigated architectural traits.** Analyses were conducted on trait data (n= 31).  
428 **(a)** Projection of the ordinated 31 fungal strains onto ten architectural trait variables (mean and CV):  
429 box counting dimension (Db), lacunarity (L), branching angle (BA), hyphal diameter (D), internodal  
430 length (IL) into two-dimensional trait space represented by principal component axis 1 and 2  
431 (explaining 34 and 18% of variance, respectively). Arrows indicate direction and weight of trait vectors.  
432 Color gradient represents probability of species occurrence (white = low, red = high) in the trait space,  
433 with the contour lines denoting the 0.50 and 0.95 quantiles of kernel density estimation (see materials  
434 and methods section). **(b)** Correlation plot of five architectural trait variables and their coefficients of  
435 variation. The upper triangle displays original while the lower triangle represents phylogenetically  
436 corrected data correlations. Color gradient and square size are proportional to correlation coefficient  
437 (Pearson's rho). Asterisks denote significance level: \*\*\* < 0.001, \*\* < 0.01, \* < 0.05. In grey, we  
438 highlight trait combinations affected by detected phylogenetic signal (Table S2). **(c-j)** The eight  
439 strongest trait relationships for either original and/or phylogenetically corrected data. Red lines  
440 represent linear regression lines and blue lines quantile regression lines, while line type depicts  
441 significance of regression lines; solid lines p-value < 0.05, dashed lines > 0.05. Corresponding  
442 regression statistics can be found in Table S4. Adjusted R<sup>2</sup> values correspond to linear regressions.  
443



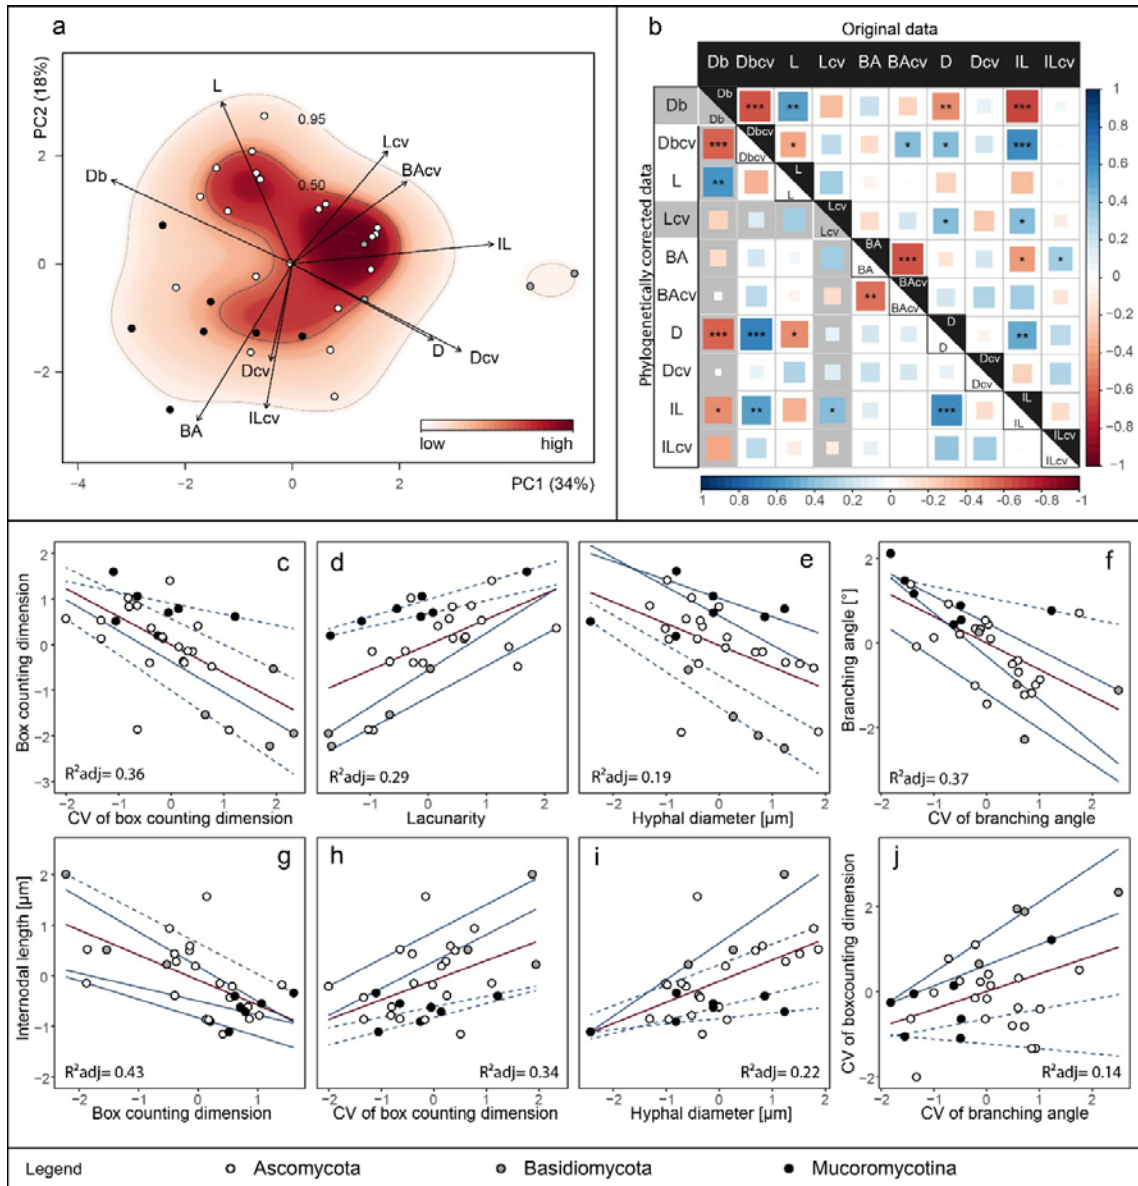

444
